# Supplementary material
Source: HighWire-hosted journal article supplement (https://thorax.bmj.com/content/75/6/468)
Supplement: inline-supplementary-material-1 [file inline-supplementary-material-1.pdf]

1

### Occupational exposure to inhaled pollutants and risk of COPD: A large UK population-based UK Biobank cohort.

Steven S Sadhra<sup>1</sup>, Nuredin I Mohammed<sup>1</sup>, Om P Kurmi<sup>2</sup>, David Fishwick<sup>3</sup>, Sara De Matteis<sup>4</sup>, Sally Hutchings<sup>5</sup>, Debbie Jarvis<sup>4</sup>, Jon G Ayres<sup>1</sup>, Lesley Rushton<sup>5</sup>,

#### Supplementary tables:

**Table S1** Summary statistics for occupational exposure to different pollutant types

| Number of pollutants (exposed to) | N (%) exposed | N (%) COPD   |
|-----------------------------------|---------------|--------------|
| 0                                 | 151587 (66.3) | 13071 (64.4) |
| 1                                 | 10667 (4.7)   | 967 (4.8)    |
| 2                                 | 22158 (9.7)   | 2216 (10.9)  |
| 3                                 | 18361 (8)     | 1826 (9)     |
| 4                                 | 14982 (6.6)   | 1330 (6.6)   |
| 5                                 | 10118 (4.4)   | 813 (4)      |
| 6                                 | 741 (0.3)     | 66 (0.3)     |

**Table S2** Correlation between different pollutant types

|         | Vapours | Gases  | Dusts  | Fumes  | Fibres | Mists  |
|---------|---------|--------|--------|--------|--------|--------|
| Vapours | 1       |        |        |        |        |        |
| Gases   | 0.4407  | 1      |        |        |        |        |
| Dusts   | 0.7319  | 0.4838 | 1      |        |        |        |
| Fumes   | 0.1999  | 0.3835 | 0.3619 | 1      |        |        |
| Fibres  | 0.2743  | 0.0197 | 0.4847 | 0.4784 | 1      |        |
| Mists   | 0.6344  | 0.3977 | 0.5884 | 0.3179 | 0.2553 | 1      |
| VGDF    | 0.6739  | 0.5851 | 0.8521 | 0.6141 | 0.4399 | 0.5408 |

2

**Table S3** Prevalence ratios (95% CI) of COPD risk defined as FEV<sub>1</sub>/FVC <LLN for job duration using the lowest quartile of duration as a reference category for each pollutant; overall (n=228 614).

| Pollutant | Job duration | Healthy exposed | COPD cases | Crude PR (95% CI) | Adjusted PR (95% CI) | p-trend for Adjusted PRs |
|-----------|--------------|-----------------|------------|-------------------|----------------------|--------------------------|
| Vapours   |              | 38866           | 3903       | 1.06 (1.03, 1.1)  | 1.03 (0.99,1.07)     |                          |
|           | Q2           | 7539            | 737        | 1.01 (0.97-1.06)  | 1.01 (0.97, 1.06)    | 0.718                    |
|           | Q3           | 9063            | 884        | 0.99 (0.95, 1.03) | 1.01 (0.97, 1.06)    |                          |
|           | Q4           | 10440           | 994        | 0.95 (0.91, 0.99) | 0.99 (0.94, 1.03)    |                          |
| Gases     |              | 30661           | 3135       | 1.08 (1.04, 1.12) | 1.04 (0.99, 1.08)    |                          |
|           | Q2           | 6015            | 600        | 1.03 (0.99, 1.07) | 1.03 (0.98,1.08)     | 0.423                    |
|           | Q3           | 7178            | 719        | 1.01 (0.97,1.05)  | 1.03 (0.99, 1.08)    |                          |
|           | Q4           | 8183            | 817        | 0.97 (0.93, 1.01) | 1.02 (0.97, 1.06)    |                          |
| Dusts     |              | 55748           | 5745       | 1.09 (1.06,1.12)  | 1.05 (1.01, 1.08)    |                          |
|           | Q2           | 10658           | 1084       | 1.02 (0.98, 1.06) | 1.01 (0.97, 1.06)    | 0.778                    |
|           | Q3           | 12629           | 1264       | 0.99 (0.96,1.03)  | 1.01 (0.97,1.06)     |                          |
|           | Q4           | 15539           | 1571       | 0.97 (0.93,1.0)   | 1.0 (0.96, 1.05)     |                          |
| B-dusts   |              | 29941           | 3093       | 1.09 (1.05,1.13)  | 1.06 (1.01, 1.10)    |                          |
|           | Q2           | 6029            | 603        | 1.03 (0.99,1.07)  | 1.02 (0.98, 1.07)    | 0.469                    |
|           | Q3           | 6962            | 703        | 1.01 (0.97,1.05)  | 1.03 (0.99, 1.08)    |                          |
|           | Q4           | 7600            | 786        | 0.98 (0.94,1.02)  | 1.01 (0.97, 1.06)    |                          |
| M-dusts   |              | 33341           | 3383       | 1.08 (1.04, 1.12) | 1.03 (0.99, 1.08)    |                          |
|           | Q2           | 6056            | 616        | 1.03 (0.99,1.08)  | 1.02 (0.98, 1.07)    | 0.796                    |
|           | Q3           | 7387            | 725        | 1.0 (0.96,1.05)   | 1.02 (0.97, 1.06)    |                          |
|           | Q4           | 9993            | 1001       | 0.97 (0.93, 1.01) | 1.01 (0.96, 1.05)    |                          |
| Fumes     |              | 33282           | 3399       | 1.08 (1.04, 1.12) | 1.02 (0.98, 1.06)    |                          |
|           | Q2           | 6271            | 641        | 1.03 (0.99, 1.08) | 1.03 (0.99, 1.08)    | 0.703                    |
|           | Q3           | 7548            | 736        | 1.0 (0.96, 1.04)  | 1.02 (0.98, 1.07)    |                          |
|           | Q4           | 8968            | 905        | 0.97 (0.93,1.01)  | 1.01 (0.96, 1.06)    |                          |
| Diesel    |              | 16902           | 1828       | 1.14 (1.08, 1.19) | 1.04 (0.98, 1.09)    |                          |
|           | Q2           | 3252            | 368        | 1.04 (1.0, 1.09)  | 1.04 (0.99,1.09)     | 0.62                     |
|           | Q3           | 3712            | 374        | 1.01 (0.97, 1.06) | 1.03 (0.98, 1.07)    |                          |
|           | Q4           | 4221            | 453        | 0.98 (0.93, 1.02) | 1.01 (0.96, 1.06)    |                          |
| Fibres    |              | 18604           | 1814       | 1.05 (1.0, 1.10)  | 0.99 (0.93, 1.04)    |                          |
|           | Q2           | 3200            | 298        | 1.04 (0.99, 1.09) | 1.03 (0.98, 1.08)    | 0.377                    |
|           | Q3           | 4023            | 371        | 1.02 (0.97, 1.06) | 1.03 (0.98, 1.08)    |                          |
|           | Q4           | 6160            | 652        | 1.0 (0.95, 1.04)  | 1.02 (0.97, 1.07)    |                          |
| Mists     |              | 27211           | 2662       | 1.04 (1.0, 1.08)  | 1.01 (0.97, 1.06)    |                          |
|           | Q2           | 5420            | 504        | 1.02 (0.98, 1.07) | 1.02 (0.98, 1.07)    | 0.943                    |
|           | Q3           | 6167            | 635        | 1.02 (0.98, 1.06) | 1.04 (0.99, 1.08)    |                          |
|           | Q4           | 7447            | 684        | 0.96 (0.92, 1.0)  | 0.99 (0.95, 1.04)    |                          |
| VGDF      |              | 69682           | 7205       | 1.09 (1.06, 1.12) | 1.04 (1.01, 1.07)    |                          |
|           | Q2           | 13350           | 1374       | 1.01 (0.98, 1.05) | 1.01 (0.97, 1.05)    | 0.971                    |
|           | Q3           | 15888           | 1584       | 0.99 (0.95, 1.02) | 1.0 (0.97, 1.05)     |                          |
|           | Q4           | 18818           | 1894       | 0.96 (0.92, 1.0)  | 1.0 (0.96, 1.04)     |                          |

~ Adjusted for sex, study centre (22 categories), age (5 years categories) and lifetime smoking exposure (ever, pack-years and year since quitting) and duration of exposures for specific pollutants.  
Healthy =non-COPD cases.

COPD, chronic obstructive pulmonary disease; PR, prevalence ratio

VGDF - Vapours, gases, dusts, or fumes, M-dusts -Mineral dusts, B- Dusts -Biological dusts

Q2, quartile 2; Q3, quartile 3; Q4, quartile 4

2

3

**Table S4** Prevalence ratios (95% CI) of COPD risk defined as FEV<sub>1</sub>/FVC <LLN adjusted for co-pollutants in never smokers

| Co-Pollutant   | All               |                       | Never smokers         |
|----------------|-------------------|-----------------------|-----------------------|
|                | Crude PR (95% CI) | Adjusted* PR (95% CI) | Adjusted# PR (95% CI) |
| <b>Vapours</b> | 1.02 (0.98, 1.06) | 1.01 (0.97, 1.05)     | 0.96 (0.91, 1.02)     |
| Gases          | 1.05 (1.01, 1.09) | 1.03 (0.99, 1.08)     | 1.04 (0.98, 1.11)     |
| Vapours        | 0.95 (0.91, 1.0)  | 0.96 (0.91, 1.01)     | 0.95 (0.98, 1.03)     |
| Dusts          | 1.12 (1.07, 1.17) | 1.07 (1.02, 1.12)     | 1.04 (0.98, 1.12)     |
| Vapours        | 1.03 (1.0, 1.07)  | 1.02 (0.99, 1.06)     | 0.99 (0.94, 1.05)     |
| Fumes          | 1.05 (1.02, 1.09) | 1.01 (0.97, 1.05)     | 0.98 (0.92, 1.04)     |
| Vapours        | 1.05 (1.02, 1.09) | 1.03 (0.99, 1.07)     | 1.02 (0.97, 1.07)     |
| Fibres         | 1.0 (0.95, 1.05)  | 0.96 (0.91, 1.01)     | 0.87 (0.80, 0.94)     |
| Vapours        | 1.07 (1.03, 1.12) | 1.04 (0.99, 1.09)     | 1.02 (0.96, 1.09)     |
| Mists          | 0.97 (0.92, 1.02) | 0.98 (0.93, 1.03)     | 0.94 (0.87, 1.02)     |
| <b>Gases</b>   | 1.01 (0.97, 1.06) | 1.01 (0.97, 1.06)     | 1.03 (0.96, 1.1)      |
| Dusts          | 1.07 (1.03, 1.11) | 1.04 (1.0, 1.08)      | 0.99 (0.94, 1.05)     |
| Gases          | 1.05 (1.01, 1.1)  | 1.05 (1.01, 1.1)      | 1.05 (0.99, 1.11)     |
| Fumes          | 1.06 (1.02, 1.1)  | 1.0 (0.95, 1.04)      | 0.96 (0.91, 1.03)     |
| Gases          | 1.07 (1.04, 1.12) | 1.05 (1.0, 1.09)      | 1.03 (0.98, 1.09)     |
| Fibres         | 1.02 (0.97, 1.07) | 0.97 (0.92, 1.02)     | 0.87 (0.80, 0.94)     |
| Gases          | 1.07 (1.03, 1.12) | 1.05 (1.0, 1.09)      | 1.06 (0.99, 1.12)     |
| Mists          | 0.99 (0.95, 1.03) | 0.98 (0.94, 1.03)     | 0.93 (0.87, 1.0)      |
| <b>Dusts</b>   | 1.07 (1.03, 1.1)  | 1.05 (1.02, 1.08)     | 1.02 (0.97, 1.07)     |
| Fumes          | 1.02 (0.99, 1.06) | 0.98 (0.94, 1.03)     | 0.97 (0.91, 1.03)     |
| Dusts          | 1.1 (1.07, 1.14)  | 1.07 (1.03, 1.11)     | 1.06 (1.0, 1.11)      |
| Fibre          | 0.94 (0.89, 0.99) | 0.92 (0.87, 0.97)     | 0.83 (0.76, 0.90)     |
| Dusts          | 1.12 (1.08, 1.16) | 1.07 (1.03, 1.11)     | 1.05 (0.99, 1.11)     |
| Mists          | 0.93 (0.89, 0.97) | 0.95 (0.9, 1.0)       | 0.92 (0.86, 0.99)     |
| <b>Fume</b>    | 1.08 (1.04, 1.13) | 1.03 (0.98, 1.08)     | 1.04 (0.97, 1.11)     |
| Fibre          | 0.97 (0.92, 1.02) | 0.96 (0.91, 1.02)     | 0.85 (0.78, 0.93)     |
| Fume           | 1.07 (1.03, 1.11) | 1.01 (0.97, 1.05)     | 0.99 (0.93, 1.06)     |
| Mists          | 0.99 (0.95, 1.03) | 1.0 (0.96, 1.05)      | 0.96 (0.90, 1.03)     |
| <b>Fibres</b>  | 1.01 (0.96, 1.06) | 0.97 (0.92, 1.02)     | 0.88 (0.81, 0.95)     |
| Mists          | 1.02 (0.98, 1.06) | 1.01 (0.97, 1.06)     | 0.99 (0.93, 1.05)     |

\*adjusted for sex, study centre (22 categories), age (5 years categories) and lifetime smoking exposure (ever, pack-years and year since quitting)

#adjusted for sex, study centre (22 categories), age (5 years categories)

Reference group for each pollutant individuals in jobs with no exposure to any of the pollutants (clean group)

COPD, chronic obstructive pulmonary disease;

VGDF - Vapours, gases, dusts, or fumes

VGDFFiM – Vapours, gases, dusts, fumes, fibres, or mists

3

4

**Table S5** Prevalence ratios (95% CI) of COPD risk spirometry defined as FEV<sub>1</sub>/FVC <LLN ever- smokers for exposure to occupational pollutants (n=203 086)

| Pollutant        | Ever-smokers category |              |                  |          | Correction for multiple testing |          |    |                 |             |
|------------------|-----------------------|--------------|------------------|----------|---------------------------------|----------|----|-----------------|-------------|
|                  | Healthy exposed       | COPD exposed | PR (95% CI)      | p-value  | Pollutant                       | p-value  | N  | Holm-Bonferroni |             |
| Vapours          | 3473                  | 876          | 1.23 (1.14-1.32) | 1.60E-08 | Dusts                           | 3.06E-11 | 1  | 0.005           | Significant |
| Gases            | 2784                  | 674          | 1.22 (1.12-1.32) | 1.47E-06 | VGDF                            | 3.69E-11 | 2  | 0.00555555      | Significant |
| Dusts            | 5329                  | 1328         | 1.24 (1.16-1.32) | 3.06E-11 | Fibres                          | 5.78E-09 | 3  | 0.00625         | Significant |
| Biological dusts | 2646                  | 676          | 1.23 (1.13-1.33) | 2.88E-07 | Vapours                         | 1.60E-08 | 4  | 0.007142857     | Significant |
| Mineral dusts    | 3361                  | 806          | 1.24 (1.15-1.34) | 4.99E-08 | Mineral dusts                   | 4.99E-08 | 5  | 0.008333333     | Significant |
| Fumes            | 3622                  | 831          | 1.22 (1.13-1.32) | 6.48E-07 | Biological dusts                | 2.88E-07 | 6  | 0.01            | Significant |
| Diesel fume      | 1944                  | 463          | 1.26 (1.14-1.39) | 2.88E-06 | Fumes                           | 6.48E-07 | 7  | 0.0125          | Significant |
| Fibres           | 1866                  | 464          | 1.34 (1.21-1.47) | 5.78E-09 | Gases                           | 1.47E-06 | 8  | 0.016666667     | Significant |
| Mists            | 2425                  | 578          | 1.17 (1.08-1.27) | 0.000186 | Diesel fume                     | 2.88E-06 | 9  | 0.025           | Significant |
| VGDF             | 6951                  | 1686         | 1.22 (1.15-1.30) | 3.69E-11 | Mists                           | 1.86E-04 | 10 | 0.05            | Significant |

4

5

5
